# Supplementary material for: Suppression of Breast Cancer by Small Molecules That Block the Prolactin Receptor
Source: MDPI journal article supplement (doi:10.3390/cancers13112662), 2021-05-28
Supplement: s1 [file s1]

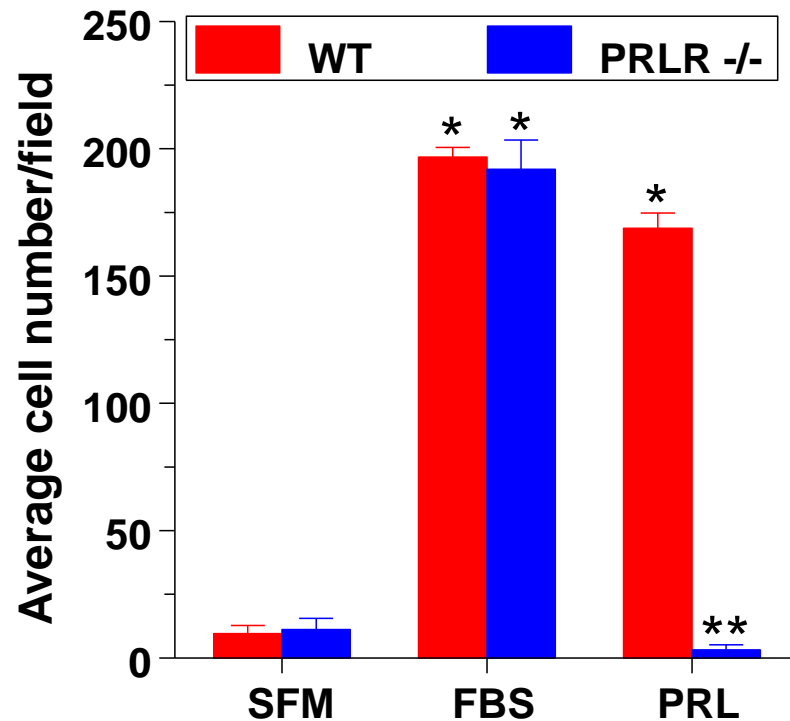

**Figure S1: Stimulation of invasion of MDA-MB-468 cells by PRL and lack of responsiveness to PRL in cells with inactivated PRLR (PRLR<sup>-/-</sup>).** Cells plated in Boyden chambers with porous membranes were treated with SFM (10% serum free medium), FBS (10% fetal bovine serum), or PRL (1nM). After 24 hrs, invading cells on the membrane underside were counted under the microscope. Values are means  $\pm$  SEM (n= 3). \* significant (p<0.05) vs SFM; \*\* significant vs PRL.

## SMI-1

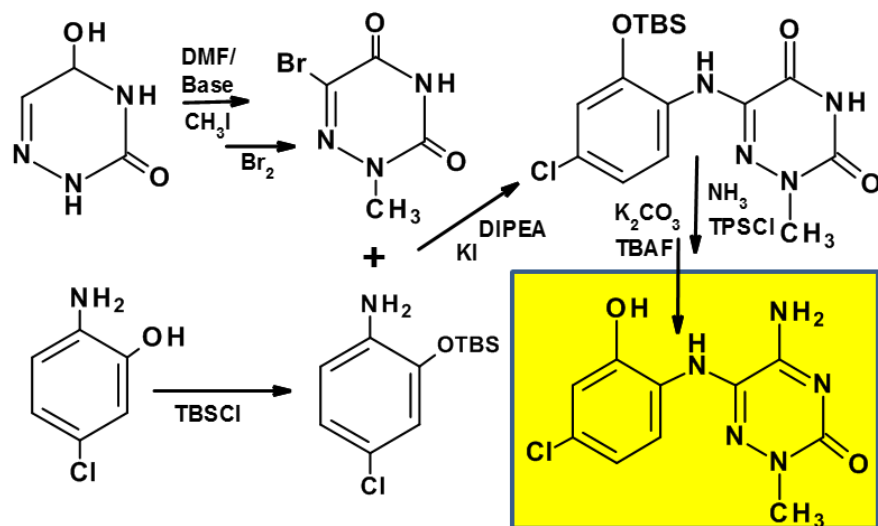

## SMI-6

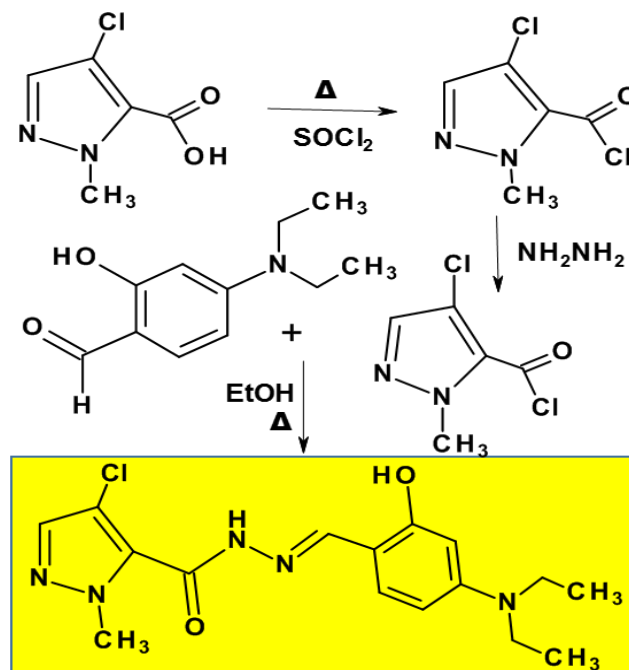

Figure S2: Steps in the biosynthesis of SMI-1 and SMI-6

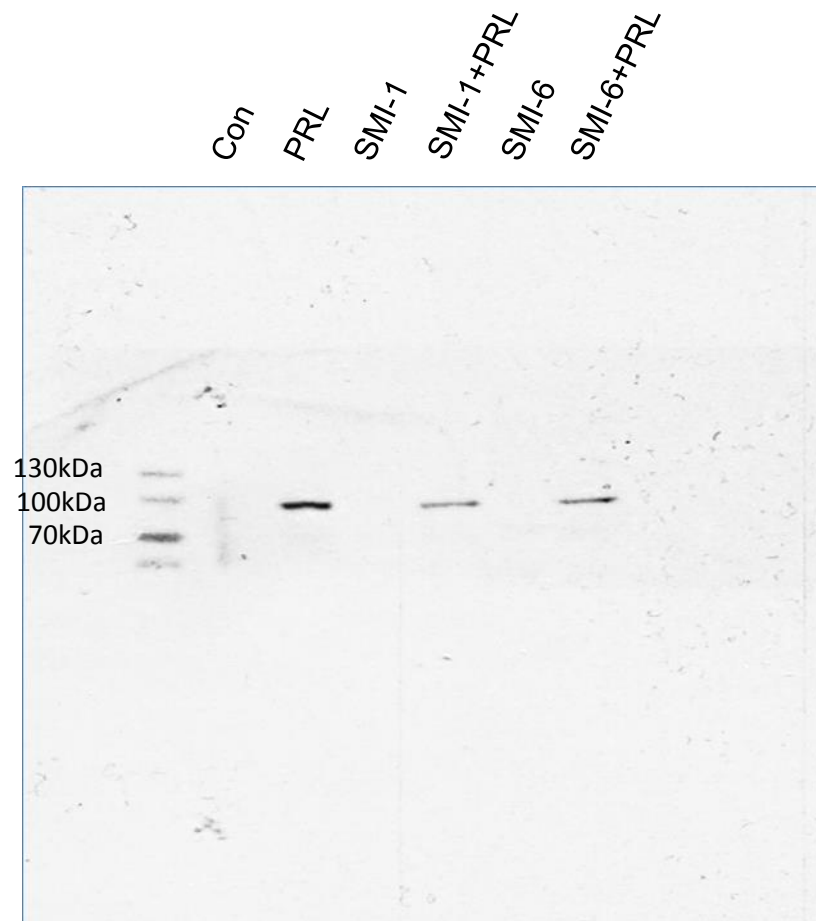

Figure S3: Full blot Phospho-Jak2

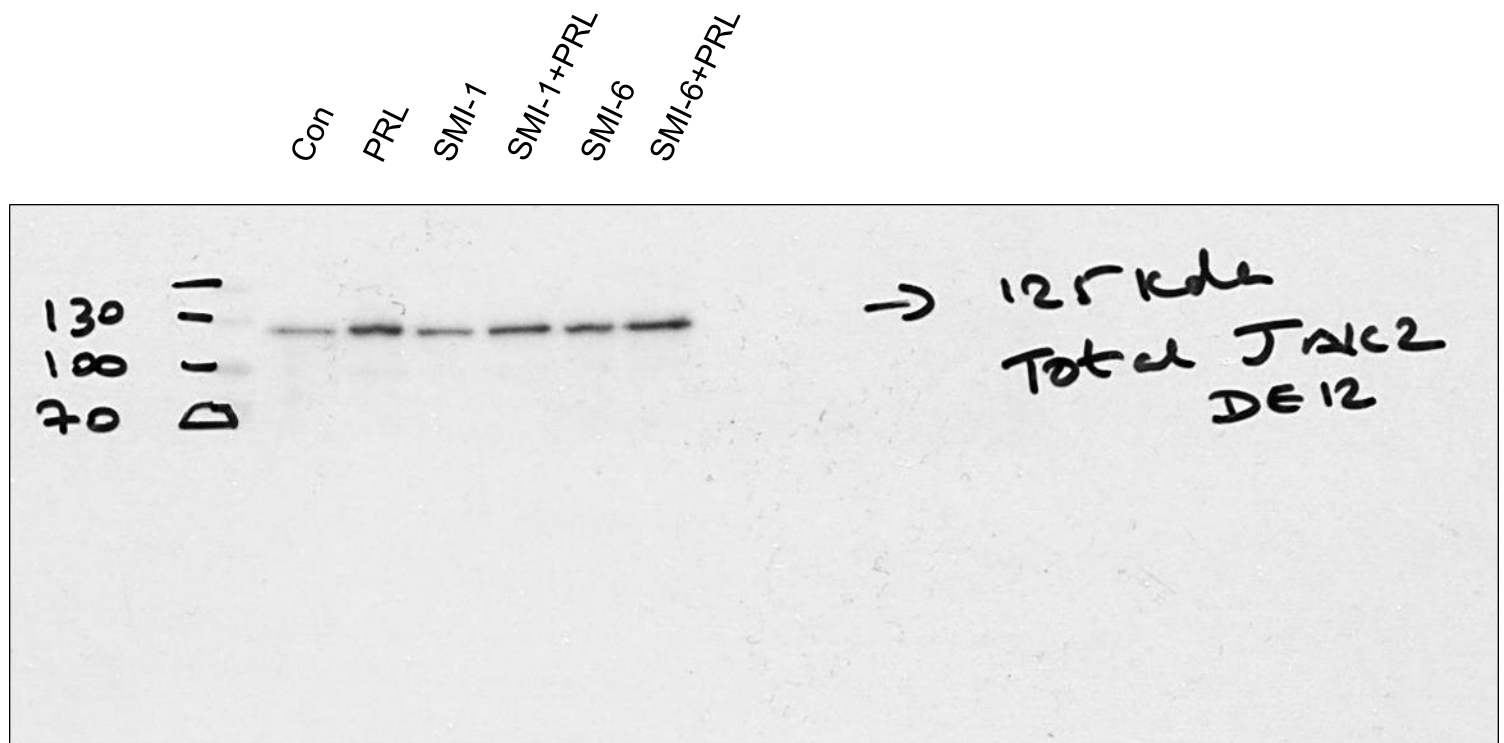

Figure S4: full blot Total Jak2
